# Supplementary material
Source: PubMed Central journal article supplement (PMC3347657)
Supplement: supp_2011.049742_2011.049742.Fabre_suppl.pdf [file supp_2011.049742_2011.049742.Fabre_suppl.pdf]

# Younger donor's age and upfront tandem are two independent prognostic factors for survival in multiple myeloma patients treated by tandem autologous-allogeneic stem cell transplantation: a retrospective study from the Société Française de Greffe de Moelle et de Thérapie Cellulaire (SFGM-TC)

Claire Fabre,<sup>1,2</sup> Serge Koscielny,<sup>2,3</sup> Mohamad Mohty,<sup>4</sup> Nathalie Fegueux,<sup>5</sup> Didier Blaise,<sup>6</sup> Natacha Maillard,<sup>7</sup> Reza Tabrizi,<sup>8</sup> Mauricette Michallet,<sup>9</sup> Gérard Socié,<sup>10</sup> Ibrahim Yakoub-Agha,<sup>11</sup> Frédéric Garban,<sup>12</sup> Madalina Uzunov,<sup>13</sup> Sylvie François,<sup>14</sup> Nathalie Contentin,<sup>15</sup> Simona Lapusan,<sup>16</sup> and Jean-Henri Bourhis<sup>1,2\*</sup>

<sup>1</sup>Institut de Cancérologie Gustave Roussy, Département de Médecine, Villejuif; <sup>2</sup>Faculté Paris Sud, Université Paris XI, Le Kremlin-Bicêtre; <sup>3</sup>Institut de Cancérologie Gustave Roussy, Service de Biostatistique et d'Epidémiologie, Villejuif; <sup>4</sup>Centre Hospitalier Universitaire (CHU) Hôtel-Dieu, Service d'Hématologie Clinique, Nantes; <sup>5</sup>CHU Saint-Eloi, Service d'Hématologie et Oncologie Médicale, Montpellier; <sup>6</sup>Institut Paoli-Calmettes, Service d'Hématologie, Marseille; <sup>7</sup>CHU La Milétrie, Service d'Hématologie, Poitiers; <sup>8</sup>CHU Haut-Lévêque, Service d'Hématologie et Thérapie Cellulaire, Pessac; <sup>9</sup>Hôpital Edouard Herriot, Service d'Hématologie, Lyon; <sup>10</sup>Hôpital Saint-Louis, Assistance Publique-Hôpitaux de Paris, Service de Greffe de Moelle Osseuse, Paris; <sup>11</sup>CHU, Service des Maladies du Sang, Lille; <sup>12</sup>CHU de Grenoble, Clinique Universitaire d'Hématologie, Grenoble, et UMR CNRS 5525 (Equipe TIMC THEREX) Université Joseph Fourier, La Tronche; <sup>13</sup>Hôpital Pitié-Salpêtrière, Assistance Publique-Hôpitaux de Paris, Service d'Hématologie Clinique, Paris; <sup>14</sup>CHU, Service des Maladies du Sang, Angers; <sup>15</sup>Centre Henri Becquerel, Département d'Hématologie, Rouen, and <sup>16</sup>Hôtel-Dieu, Assistance Publique-Hôpitaux de Paris, Service d'Hématologie, Paris, France

Citation: Fabre C, Koscielny S, Mohty M, Fegueux N, Blaise D, Maillard N, Tabrizi R, Michallet M, Socié G, Yakoub-Agha I, Garban F, Uzunov M, François S, Contentin N, Lapusan S, and Bourhis J-H. Younger donor's age and upfront tandem are two independent prognostic factors for survival in multiple myeloma patients treated by tandem autologous-allogeneic stem cell transplantation: a retrospective study from the Société Française de Greffe de Moelle et de Thérapie Cellulaire (SFGM-TC). *Haematologica* 2012;97(4):482-490. doi:10.3324/haematol.2011.049742

**Online Supplementary Table S1A.** Univariate analysis of overall survival, event-free survival and transplant-related mortality following tandem autologous-allogeneic SCT (Cox's regression)

| Variable                                                   | Value                         | Deaths/<br>total | Overall<br>Survival<br>(95% CI) | P<br>value(+) | N. events/<br>total | Event-Free<br>Survival<br>(95% CI) | P value(+)<br>total | N events/<br>total | Transplant-<br>related mortality<br>(95% CI) | P<br>value(+) |
|------------------------------------------------------------|-------------------------------|------------------|---------------------------------|---------------|---------------------|------------------------------------|---------------------|--------------------|----------------------------------------------|---------------|
| Gender                                                     | Female                        | 26/60            | 0.51 (0.37-0.65)                | 0.45          | 39/60               | 0.31 (0.19-0.45)                   | 0.7                 | 9/60               | 0.15 (0.08-0.27)                             | 0.98          |
|                                                            | Male                          | 43/86            | 0.46 (0.34-0.57)                |               | 57/86               | 0.24 (0.15-0.35)                   |                     | 13/86              | 0.15 (0.09-0.24)                             |               |
| Age at diagnosis<br>(years)                                | < 50                          | 28/69            | 0.54 (0.41-0.67)                | 0.05          | 41/69               | 0.35 (0.24-0.49)                   | 0.02                | 10/69              | 0.14 (0.08-0.25)                             | 0.85          |
|                                                            | ≥ 50                          | 41/77            | 0.42 (0.30-0.55)                |               | 55/77               | 0.19 (0.11-0.31)                   |                     | 12/77              | 0.16 (0.09-0.26)                             |               |
| β2<br>microglobulin                                        | Missing data                  | 38/77            |                                 | 0.54          | 49/77               |                                    | 0.98                | 10/77              |                                              | 0.73          |
|                                                            | > 3 mg/L                      | 24/48            | 0.53 (0.38-0.67)                |               | 33/48               | 0.25 (0.14-0.39)                   |                     | 8/48               | 0.17 (0.08-0.3)                              |               |
|                                                            | ≤ 3 mg/L                      | 7/21             | 0.59 (0.35-0.79)                |               | 14/21               | 0.25 (0.10-0.51)                   |                     | 4/21               | 0.19 (0.07-0.41)                             |               |
| Isotype                                                    | Missing data                  | 3/6              |                                 | 0.69          | 4/6                 |                                    | 0.37                | 2/6                |                                              | 0.37          |
|                                                            | G, A, D                       | 51/108           | 0.47 (0.36-0.58)                |               | 73/108              | 0.23 (0.15-0.34)                   |                     | 17/108             | 0.16 (0.10-0.24)                             |               |
|                                                            | Light chain,<br>non secretory | 15/32            | 0.52 (0.34-0.69)                |               | 19/32               | 0.33 (0.18-0.52)                   |                     | 3/32               | 0.09 (0.03-0.27)                             |               |
| Durie<br>Salmon<br>stage                                   | Missing data                  | 5/13             |                                 | 0.91          | 7/13                |                                    | 0.39                | 3/13               |                                              | 0.29          |
|                                                            | I                             | 4/8              | 0.47 (0.21-0.75)                |               | 5/8                 | 0.33 (0.12-0.64)                   |                     | 2/8                | 0.25 (0.07-0.6)                              |               |
|                                                            | II                            | 8/17             | 0.55 (0.32-0.76)                |               | 11/17               | 0.35 (0.16-0.59)                   |                     | 3/17               | 0.18 (0.06-0.43)                             |               |
|                                                            | III                           | 52/108           | 0.47 (0.37-0.58)                |               | 73/108              | 0.25 (0.17-0.35)                   |                     | 14/108             | 0.13 (0.08-0.21)                             |               |
| ISS score                                                  | Missing data                  | 34/71            |                                 | 0.66          | 44/71               |                                    | 0.79                | 9/71               |                                              | 0.76          |
|                                                            | 1                             | 13/27            | 0.46 (0.28-0.65)                |               | 20/27               | 0.19 (0.07-0.42)                   |                     | 5/27               | 0.19 (0.08-0.38)                             |               |
|                                                            | 2                             | 8/21             | 0.68 (0.45-0.84)                |               | 14/21               | 0.31 (0.15-0.52)                   |                     | 2/21               | 0.1 (0.02-0.34)                              |               |
|                                                            | 3                             | 14/27            | 0.46 (0.28-0.66)                |               | 18/27               | 0.21 (0.09-0.41)                   |                     | 6/27               | 0.22 (0.10-0.41)                             |               |
| Renal stage                                                | Missing data                  | 24/48            |                                 | 0.79          | 31/48               |                                    | 0.29                | 7/48               |                                              | 0.64          |
|                                                            | A                             | 38/82            | 0.49 (0.37-0.61)                |               | 54/82               | 0.25 (0.16-0.37)                   |                     | 12/82              | 0.15 (0.08-0.24)                             |               |
|                                                            | B                             | 7/16             | 0.57 (0.33-0.78)                |               | 11/16               | 0.29 (0.13-0.52)                   |                     | 3/16               | 0.19 (0.06-0.45)                             |               |
|                                                            | Missing data                  | 36/75            |                                 |               | 47/75               |                                    |                     | 12/75              |                                              |               |
| Chromosome<br>13 deletion                                  | No                            | 11/31            | 0.60 (0.40-0.78)                | 0.2           | 19/31               | 0.26 (0.13-0.46)                   | 0.53                | 5/31               | 0.16 (0.07-0.34)                             | 0.65          |
|                                                            | Yes                           | 22/40            | 0.43 (0.28-0.59)                |               | 30/40               | 0.18 (0.08-0.34)                   |                     | 5/40               | 0.13 (0.05-0.27)                             |               |
| Number of<br>treatment lines<br>before tandem<br>procedure | 1                             | 35/77            | 0.56 (0.45-0.67)                | 0.10          | 50/77               | 0.36 (0.26-0.47)                   | 0.02                | 8/77               | 0.1 (0.05-0.20)                              | 0.24          |
|                                                            | 2                             | 29/56            | 0.32 (0.18-0.49)                |               | 38/56               | 0.09 (0.03-0.26)                   |                     | 12/56              | 0.21 (0.13-0.34)                             |               |
|                                                            | 3                             | 1/6              | 0.83 (0.38-0.98)                |               | 2/6                 | 0.67 (0.32-0.9)                    |                     | 1/6                | 0.17 (0.02-0.62)                             |               |
|                                                            | > 3                           | 4/7              | 0.57 (0.27-0.83)                |               | 6/7                 | 0.29 (0.10-0.6)                    |                     | 1/7                | 0.14 (0.02-0.59)                             |               |

continued from previous page

|                                                                   |                   |        |                  |      |        |                  |        |        |                  |       |
|-------------------------------------------------------------------|-------------------|--------|------------------|------|--------|------------------|--------|--------|------------------|-------|
| Number of auto-SCT before tandem                                  | 0                 | 44/93  | 0.53 (0.42-0.63) | 0.03 | 63/93  | 0.31 (0.22-0.42) | 0.05   | 11/93  | 0.12 (0.07-0.2)  | 0.03  |
|                                                                   | 1                 | 13/35  | 0.43 (0.23-0.65) |      | 19/35  | 0.17 (0.06-0.41) |        | 5/35   | 0.14 (0.06-0.31) |       |
|                                                                   | 2                 | 12/18  | 0.25 (0.10-0.5)  |      | 14/18  | 0.09 (0.02-0.35) |        | 6/18   | 0.33 (0.16-0.56) |       |
| Upfront tandem                                                    | No                | 34/69  | 0.34 (0.21-0.5)  | 0.02 | 46/69  | 0.11 (0.04-0.26) | 0.005  | 14/69  | 0.2 (0.12-0.31)  | 0.08  |
|                                                                   | Yes               | 35/77  | 0.56 (0.45-0.67) |      | 50/77  | 0.36 (0.26-0.47) |        | 8/77   | 0.1 (0.05-0.2)   |       |
| CD34+ dose for auto-SCT ( $\times 10^6/\text{kg}$ ) of the tandem | $\leq 4$          | 42/97  | 0.47 (0.36-0.59) | 0.72 | 60/97  | 0.27 (0.18-0.39) | 0.58   | 16/97  | 0.16 (0.10-0.25) | 0.53  |
|                                                                   | $> 4$             | 27/49  | 0.5 (0.36-0.64)  |      | 36/49  | 0.26 (0.16-0.41) |        | 6/49   | 0.12 (0.05-0.25) |       |
| Allo-SCT conditioning regimen                                     | Myeloablative     | 9/17   | 0.47 (0.27-0.68) | 0.93 | 11/17  | 0.35 (0.18-0.57) | 0.39   | 4/17   | 0.24 (0.09-0.48) | 0.31  |
|                                                                   | Non myeloablative | 60/129 | 0.48 (0.38-0.58) |      | 85/129 | 0.25 (0.17-0.35) |        | 18/129 | 0.14 (0.09-0.21) |       |
| TBI                                                               | No                | 44/81  | 0.46 (0.35-0.58) | 0.55 | 63/81  | 0.24 (0.16-0.35) | 0.11   | 13/81  | 0.16 (0.10-0.26) | 0.66  |
|                                                                   | Yes               | 25/65  | 0.5 (0.35-0.64)  |      | 33/65  | 0.31 (0.19-0.46) |        | 9/65   | 0.14 (0.07-0.25) |       |
| CD34+ dose for allo-SCT ( $\times 10^6/\text{kg}$ ) of the tandem | $\leq 5.7$        | 47/91  | 0.42 (0.31-0.53) | 0.07 | 61/91  | 0.24 (0.15-0.35) | 0.21   | 15/91  | 0.16 (0.10-0.26) | 0.57  |
|                                                                   | $> 5.7$           | 22/55  | 0.57 (0.42-0.71) |      | 35/55  | 0.31 (0.19-0.45) |        | 7/55   | 0.13 (0.06-0.25) |       |
| Stem cell source                                                  | Cord blood        | 0/4    |                  |      | 1/4    |                  |        | 0/4    |                  |       |
|                                                                   | PBSC              | 64/136 | 0.49 (0.40-0.58) | 0.12 | 90/136 | 0.27 (0.19-0.36) | 0.29   | 21/136 | 0.15 (0.10-0.23) | 0.82  |
|                                                                   | BM                | 5/6    | 0.17 (0.04-0.51) |      | 5/6    | 0.17 (0.04-0.51) |        | 1/6    | 0.17 (0.02-0.62) |       |
| Donor type                                                        | Sibling           | 55/115 | 0.51 (0.41-0.6)  | 0.29 | 80/115 | 0.26 (0.18-0.36) | 0.75   | 17/115 | 0.15 (0.09-0.23) | 0.9   |
|                                                                   | Unrelated         | 14/31  | 0.31 (0.14-0.56) |      | 16/31  | 0.27 (0.12-0.5)  |        | 5/31   | 0.16 (0.07-0.34) |       |
|                                                                   | Missing data      | 2/4    |                  |      | 2/4    |                  |        | 1/4    |                  |       |
| Donors' age (years)                                               | $\leq 50$         | 30/79  | 0.54 (0.41-0.67) | 0.02 | 45/79  | 0.35 (0.24-0.48) | 0.005  | 6/79   | 0.08 (0.03-0.16) | 0.006 |
|                                                                   | $> 50$            | 37/63  | 0.41 (0.29-0.55) |      | 49/63  | 0.16 (0.08-0.28) |        | 15/63  | 0.24 (0.15-0.36) |       |
| Chimerism                                                         | Full              | 56/125 | 0.50 (0.40-0.60) | 0.03 | 79/125 | 0.28 (0.20-0.38) | 0.0006 | 21/125 | 0.17 (0.11-0.24) | 0.16  |
|                                                                   | Mixed             | 13/21  | 0.35 (0.17-0.59) |      | 17/21  | (0.07-0.41)      |        | 1/21   | 0.05 (0.00-0.37) |       |
| All patients                                                      |                   | 69/146 | 0.48 (0.39-0.57) |      | 96/146 | 0.27 (0.19-0.36) |        | 22/146 | 0.15 (0.10-0.22) |       |

Allo-SCT indicates allogeneic transplantation; Auto-SCT, autologous transplantation; BM: bone marrow; ISS: International Staging System; PBSC: peripheral blood stem cells; TBI: total body irradiation. P value(+): log-rank P-value comparing groups with non data available for the studied parameter.

**Online Supplementary Table S1B. Multivariable analysis of overall survival, event-free survival and transplant-related mortality following tandem auto-allo-SCT (Cox's regression).**

| Variable                                  | Overall survival     |         | Event-free survival  |         | Transplant-related mortality |         |
|-------------------------------------------|----------------------|---------|----------------------|---------|------------------------------|---------|
|                                           | HR (95% CI interval) | P value | HR (95% CI interval) | P value | HR (95% CI interval)         | P value |
| Number of auto-SCT before tandem $\geq 1$ | 1.40 (1.02-1.93)     | 0.04    |                      |         | 1.91 (1.15-3.19)             | 0.01    |
| Upfront tandem                            |                      |         | 0.56 (0.37-0.85)     | 0.006   |                              |         |
| Donor's age $> 50$ years                  | 1.99 (1.22-3.25)     | 0.006   | 2.13 (1.40-3.25)     | 0.0004  | 3.86 (1.49-9.97)             | 0.006   |
| Full chimerism                            | 0.46 (0.25-0.86)     | 0.02    | 0.35 (0.20-0.61)     | 0.0002  |                              |         |

Results are presented as hazard ratio (HR) with corresponding 95 % confidence interval (95 % CI) and P values.
