# Supplementary material
Source: PubMed Central journal article supplement (PMC3347657)
Supplement: supp_2011.049742_2011_049742-Contributions.pdf [file supp_2011.049742_2011_049742-Contributions.pdf]

**Manuscript no. HAEMATOL/2011/049742 entitled "Younger donor's age and upfront tandem are two independent prognostic factors of survival in multiple myeloma patients treated by tandem autologous-allogeneic stem cell transplantation: a retrospective study from the Société Française de Greffe de Moelle et de Thérapie Cellulaire (SFGM-TC)"**

**Authors: Claire Fabre, Serge Koscielny, Mohamad Mohty, Nathalie Fegueux, Didier Blaise, Natacha Maillard, Reza Tabrizi, Mauricette Michallet, Gérard Socié, Ibrahim Yakoub-Agha, Frédéric Garban, Madalina Uzunov, Sylvie François, Nathalie Contentin, Simona Lapusan, and Jean-Henri Bourhis.**

**Information about the contributions of each person named as having participated in the study**

**1) Guarantor(s), i.e., person(s) who is (are) responsible for the integrity of the work as a whole:**

- Jean-Henri Bourhis, Institut de Cancérologie Gustave Roussy, Département de Médecine, Villejuif, jean-henri-bourhis@igr.fr
- Serge Koscielny, Institut de Cancérologie Gustave Roussy, Service de Biostatistique et d'Epidémiologie, Villejuif, serge.koscielny@igr.fr
- Claire Fabre, Institut Curie, Département d'Oncologie Médicale, Paris, claire.fabre@curie.net

According to the International Committee of Medical Journal Editors (ICMJE)

([http://www.icmje.org/ethical\\_1author.html](http://www.icmje.org/ethical_1author.html)): "Authorship credit should be based on: 1) substantial contributions to conception and design, acquisition of data, or analysis and interpretation of data; 2) drafting the article or revising it critically for important intellectual content; and 3) final approval of the version to be published. Authors should meet conditions 1, 2, and 3 ..... Acquisition of funding, collection of data, or general supervision of the research group alone does not constitute authorship".

**The guarantors of this manuscript confirm that all persons designated as authors qualify for authorship, and that each author has participated sufficiently in the work to take public responsibility for appropriate portions of the content.**

**2) Authors who participated in the conception of the study: Jean-Henri Bourhis, Serge Koscielny, Claire Fabre**

**3) Design & Methods.** The following authors were responsible for specific investigations

- Nathalie Fegueux was responsible for acquisition, analysis and interpretation of data for patients treated in Montpellier
- Didier Blaise was responsible for acquisition, analysis and interpretation of data for patients treated in Marseille
- Natacha Maillard was responsible for acquisition, analysis and interpretation of data for patients treated in Poitiers
- Reza Tabrizi was responsible for acquisition, analysis and interpretation of data for patients treated in Bordeaux
- Mauricette Michallet was responsible for acquisition, analysis and interpretation of data for patients treated in Lyon
- Gérard Socié was responsible for acquisition, analysis and interpretation of data for patients treated in Hôpital Saint-Louis, Paris
- Ibrahim Yakoub-Agha was responsible for acquisition, analysis and interpretation of data for patients treated in Lille
- Frédéric Garban was responsible for acquisition, analysis and interpretation of data for patients treated in Grenoble

- Madalina Uzunov was responsible for acquisition, analysis and interpretation of data for patients treated in Hôpital Pitié-Salpêtrière, Paris
- Sylvie François was responsible for acquisition, analysis and interpretation of data for patients treated in Angers
- Nathalie Contentin was responsible for acquisition, analysis and interpretation of data for patients treated in Rouen
- Simona Lapusan was responsible for acquisition, analysis and interpretation of data for patients treated in Hôpital Saint-Antoine, Paris

4) **Results.** The following authors were responsible for specific portions of the results, including figures and tables

- Jean-Henri Bourhis
- Serge Koscielny
- Claire Fabre
- Mohamad Mohty

These four authors were responsible for all tables (1 to 4), figures (1 and 2 ABCDEF), and supplemental tables S1A and S1B.

5) **Writing the manuscript.** The following authors were responsible for writing the manuscript:

- Jean-Henri Bourhis
- Dr. Serge Koscielny
- Claire Fabre
- Mohamad Mohty

6) **Contributors Listed in Acknowledgments:**

|                                                     |                 |
|-----------------------------------------------------|-----------------|
| Nicole Raus, SFGM-TC                                | Data collection |
| Hervé AVET-LOISEAU, Hôtel-Dieu, Nantes              | Data collection |
| Christian Berthou, Hôpital Morvan, Brest            | Data collection |
| Jacques-Olivier Bay, CHU Estaing, Clermont-Ferrand  | Data collection |
| Catherine Cordonnier, Hôpital Henri-Mondor, Créteil | Data collection |
| Luc Fouillard, Hôpital Saint-Antoine, Paris         | Data collection |
| Bruno Lioure, Hôpital de Hautepierre, Strasbourg    | Data collection |
